# Supplementary material
Source: PubMed Central journal article supplement (PMC3375271)

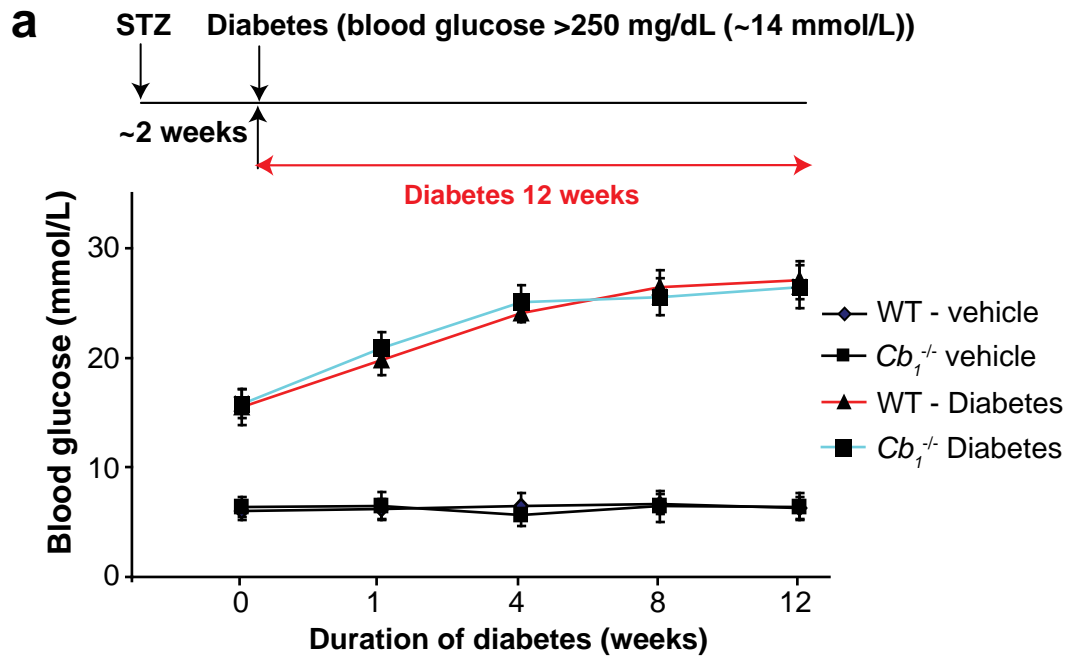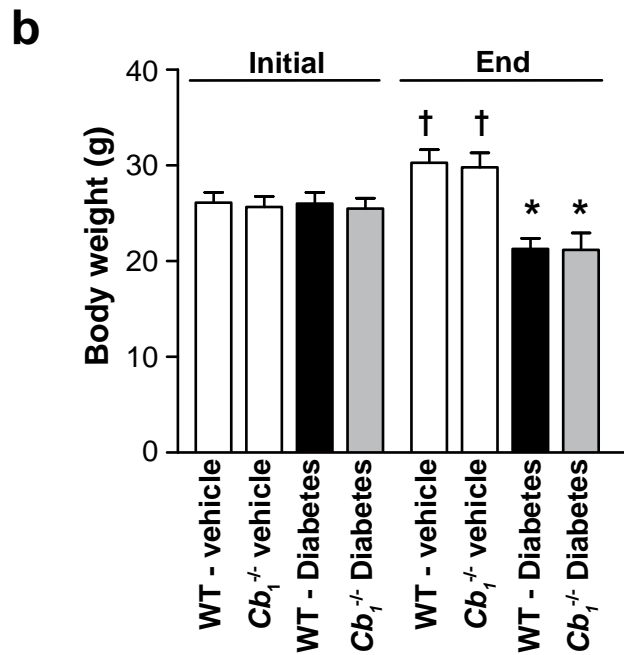

Suppl. Fig. 1

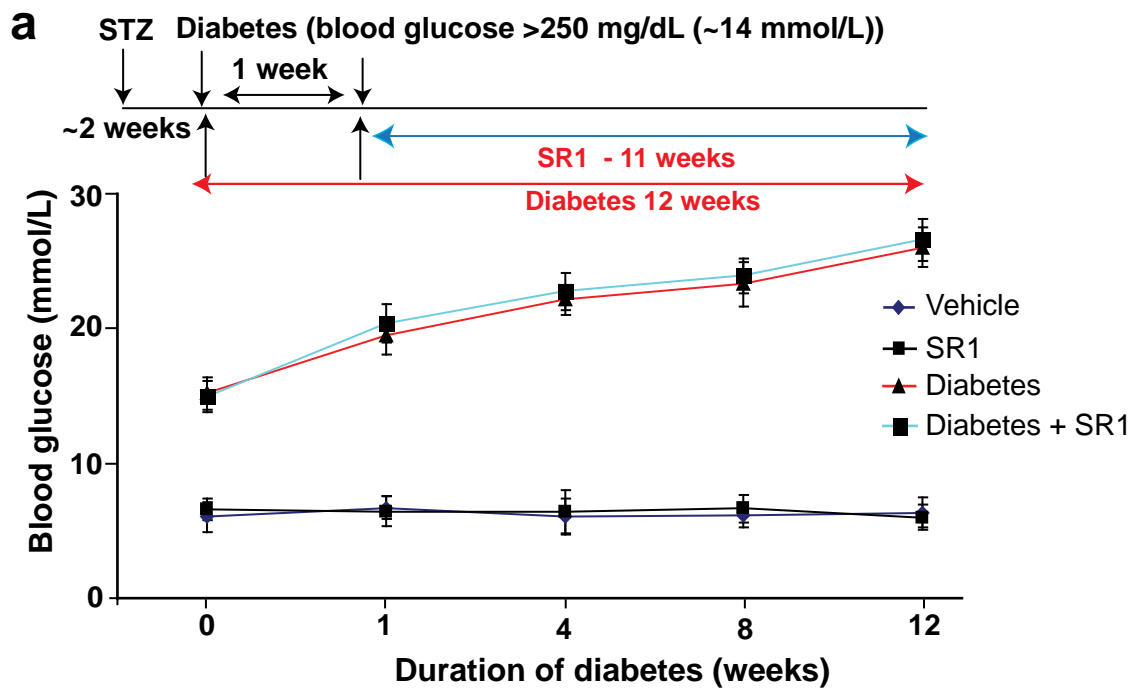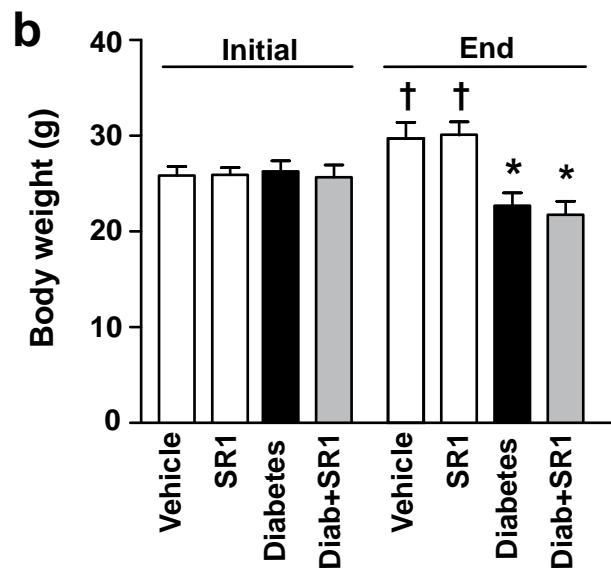

Suppl. Fig. 2

Supplement: NIHMS383549-supplement-suppl_Figs_1_and_2.pdf [file NIHMS383549-supplement-suppl_Figs_1_and_2.pdf]
